# Supplementary material
Source: PubMed Central journal article supplement (PMC9833091)
Supplement: tpmd210447.SD1.pdf [file tpmd210447.SD1.pdf]

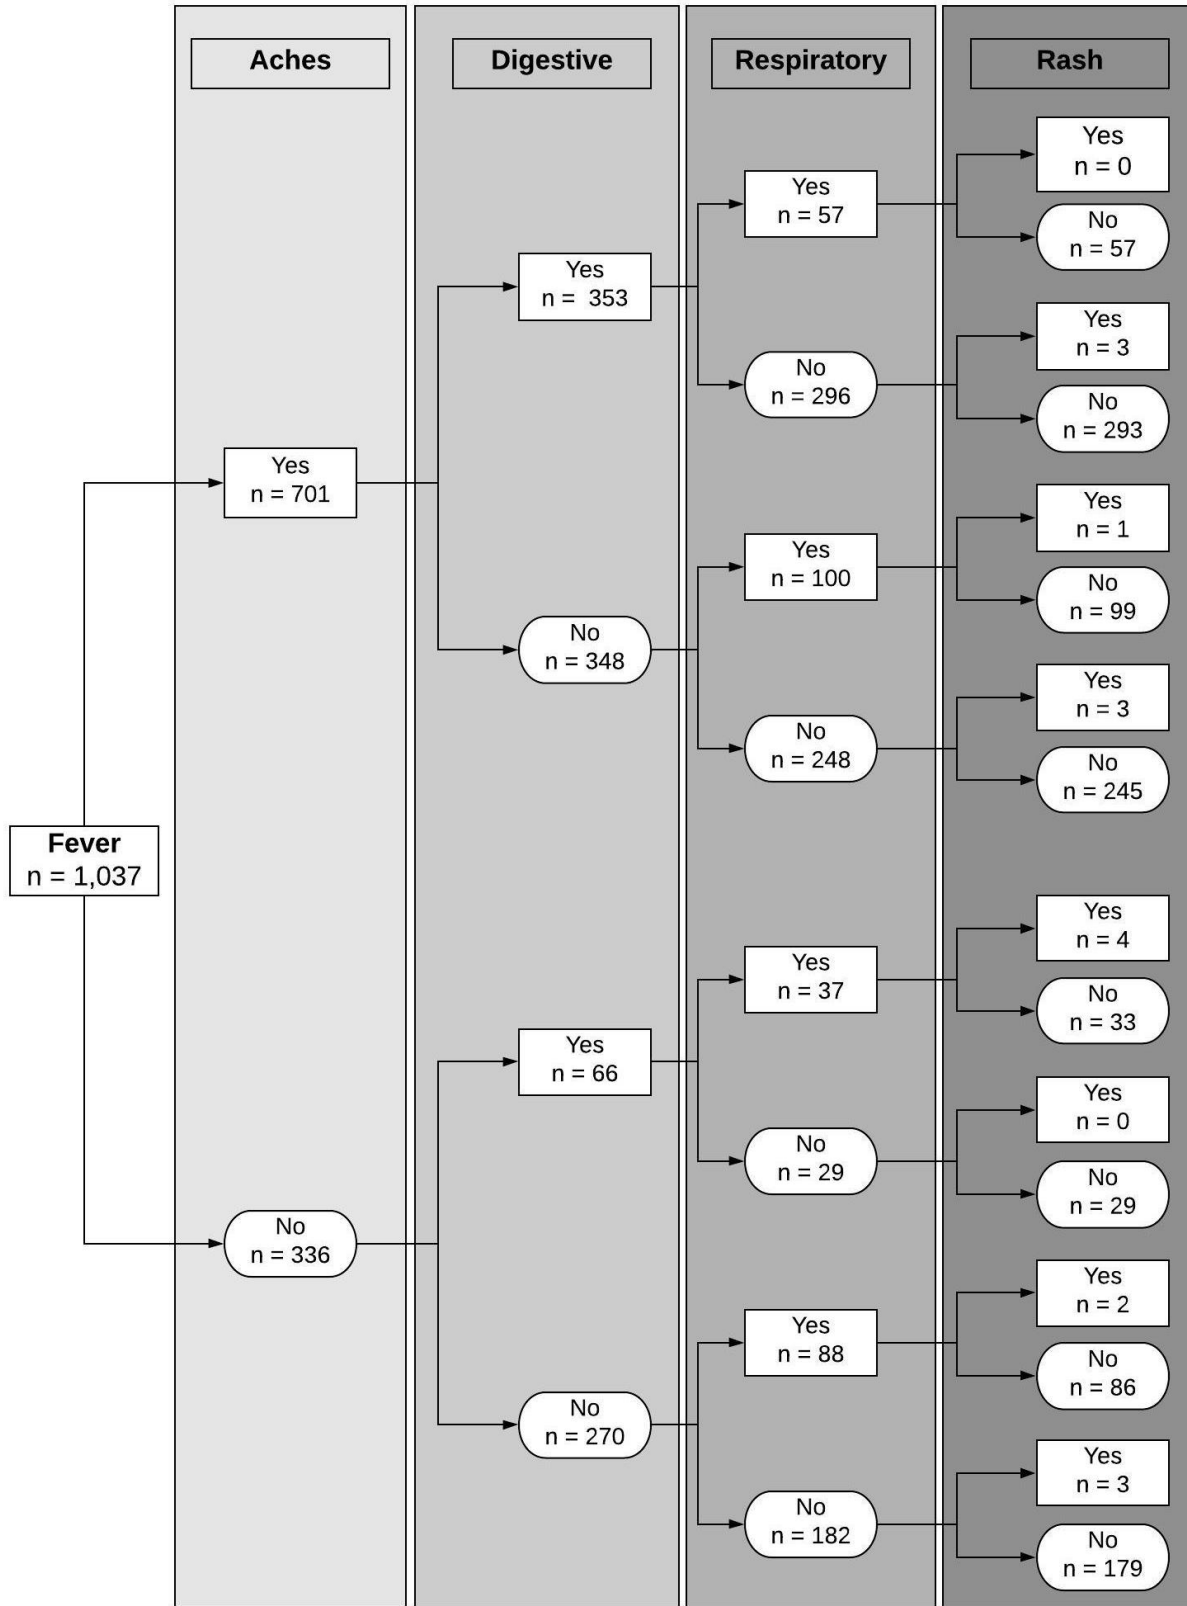

**Supplemental Figure 1. Flow diagram of classification of self-reported symptoms from the cross-sectional study in Western Kenya in 2015 included in the analysis.**

## Figure Legends

**Supplemental Figure 1. Flow diagram of classification of self-reported symptoms from the cross-sectional study in Western Kenya in 2015 included in the analysis.**

Note: The gray rectangles represent the categories of self-reported symptoms. Fever is the start point.

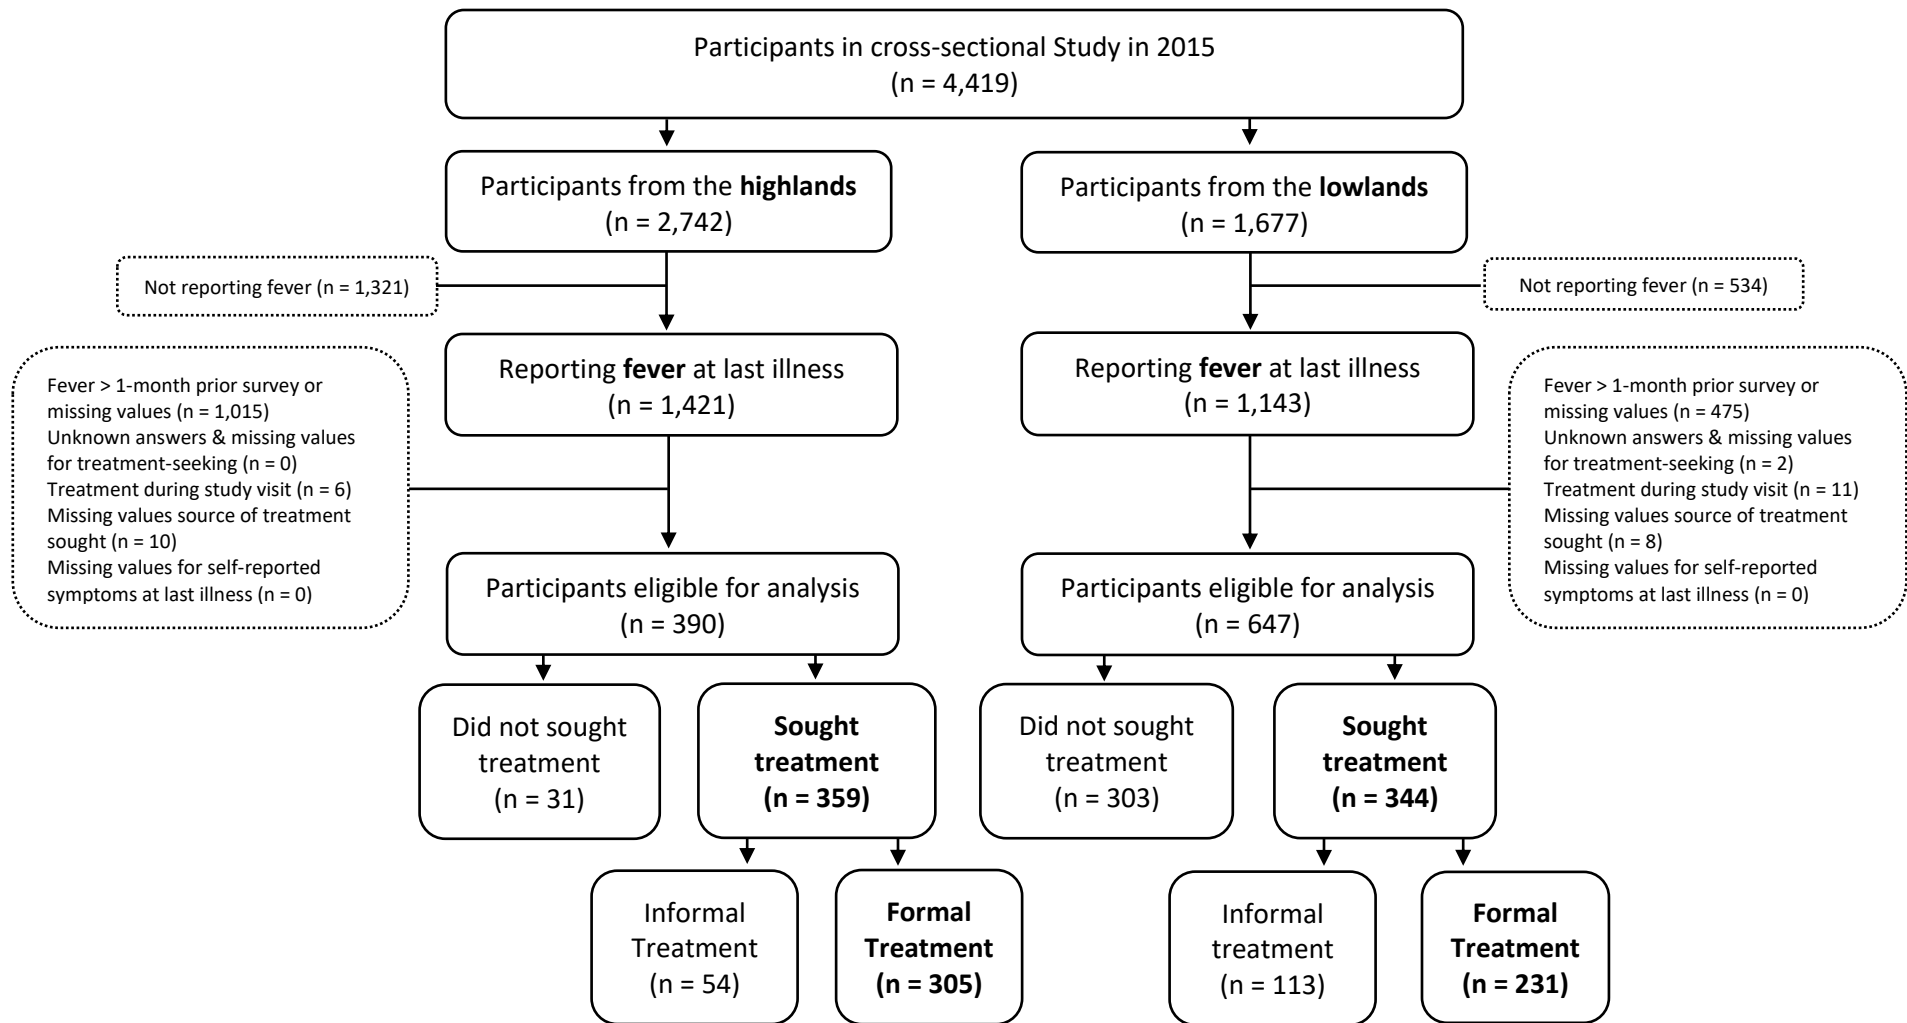

Supplemental Figure 1. Flow diagram of participants from the cross-sectional study in Western Kenya in 2015 included in the analysis.

## Figure Legends

**Supplemental Figure 1. Flow diagram of participants from the cross-sectional study in Western Kenya in 2015 included in the analysis.**

Note: The outcomes of interest are indicated in bold.
